# Supplementary material for: Potent and selective inhibition of pathogenic viruses by engineered ubiquitin variants
Source: PubMed Central journal article supplement (PMC5451084; doi:10.1371/journal.ppat.1006372), 2017-05-18
Supplement: ppat.1006372.s013.pdf [file ppat.1006372.s013.pdf]

**Table S1.** EC<sub>50</sub> (Ub/UbV) and IC<sub>50</sub> (UbV) values to cognate viral proteases.

| Ub/UbV      | EC <sub>50</sub><br>(mean) | 95%<br>confidence<br>intervals | Ub-AMC<br>IC <sub>50</sub> (nM,<br>mean) | 95%<br>confidence<br>intervals (nM) | ISG15-<br>AMC IC <sub>50</sub><br>(nM, mean) | 95%<br>confidence<br>intervals (nM) |
|-------------|----------------------------|--------------------------------|------------------------------------------|-------------------------------------|----------------------------------------------|-------------------------------------|
| <b>Ub</b>   | <b>325 μM</b>              | 290 to 363                     |                                          |                                     |                                              |                                     |
| <b>ME.1</b> | 0.7 nM                     | 0.65 to 0.79                   | 3.9                                      | 3.52 to 4.27                        | 10.8                                         | 6.80 to 17.08                       |
| <b>ME.2</b> | 0.9 nM                     | 0.77 to 0.93                   | 3.0                                      | 2.14 to 4.24                        | 16.4                                         | 11.94 to 22.57                      |
| <b>ME.3</b> | 4.5 nM                     | 3.31 to 6.00                   | 13.7                                     | 10.22 to 18.23                      | 88.9                                         | 47.62 to 165.8                      |
| <b>ME.4</b> | 0.2 nM                     | 0.17 to 0.21                   | 0.8                                      | 0.75 to 0.91                        | 1.2                                          | 1.00 to 1.38                        |
| <b>Ub</b>   | <b>512 μM</b>              | 475 to 552                     |                                          |                                     |                                              |                                     |
| <b>CC.1</b> | 50 nM                      | 42.7 to 58.6                   | 770                                      | 11.97 to 49610                      |                                              | Out of range                        |
| <b>CC.2</b> | 8.9 nM                     | 8.05 to 9.74                   | 10.3                                     | 8.76 to 12.12                       | 42.1                                         | 32.28 to 52.86                      |
| <b>CC.3</b> | 9.6 nM                     | 9.28 to 9.98                   | 8.8                                      | 7.32 to 10.52                       | 102.4                                        | 66.26 to 158.1                      |
| <b>CC.4</b> | 0.9 nM                     | 0.85 to 0.93                   | 3.3                                      | 2.64 to 4.00                        | 10.9                                         | 7.56 to 15.68                       |
| <b>CC.5</b> | 35.6 nM                    | 32.2 to 39.3                   | 390                                      | 230.4 to 659.4                      |                                              | Out of range                        |

Note: In the figures, data are represented as mean ± S.D. of three independent experiments.
