# Supplementary material for: Potent and selective inhibition of pathogenic viruses by engineered ubiquitin variants
Source: PubMed Central journal article supplement (PMC5451084; doi:10.1371/journal.ppat.1006372), 2017-05-18
Supplement: ppat.1006372.s014.pdf [file ppat.1006372.s014.pdf]

**Table S2.** Binding affinities of viral proteases and UbVs evaluated by Bio-Layer Interferometry (BLI).

| <b>Ligands</b>                       | <b>Analytes</b> | <b>K<sub>D</sub></b> |
|--------------------------------------|-----------------|----------------------|
| <b>CCHFV-<br/>OTU</b>                | CC.1            | 463 ± 44.3 nM        |
|                                      | CC.2            | 158 ± 11.2 nM        |
|                                      | CC.3            | 453 ± 17.2 nM        |
|                                      | CC.4            | 9.0 ± 0.4 nM         |
|                                      | CC.5            | 10.4 ± 0.7 nM        |
| <b>MERS-CoV<br/>PL<sup>pro</sup></b> | ME.1            | 19.4 ± 0.7 nM        |
|                                      | ME.2            | 53.2 ± 2.2 nM        |
|                                      | ME.3            | 15.6 ± 0.4 nM        |
|                                      | ME.4            | 35.9 ± 1.6 nM        |
